# Supplementary material for: Isolation and identification of two highly virulent Glaesserella parasuis serovar 7 strains in China
Source: Research Square preprint supplement (doi:10.21203/rs.3.rs-6901161/v1), 2025-08-12
Supplement: Supplementary file 1 [file 894d486aab2e3692a0fcfce9.xlsx]

## Sheet: Sheet1
Table S1. Details of G. parasuis strains used in this study
Strain	BioSample	BioProject	Assembly	Level	Size(Mb)	GC%	Scaffolds	CDS	serotype	ST
sHPS7	SAMN14142481	PRJNA607642	GCA_011044275.1	Complete	2.27621	40	1	2034	7	4
29755	SAMN06464217	PRJNA377707	GCA_003286935.1	Complete	2.3526	40	1	2157	5	8
CCUG 3712	SAMN06308701	PRJNA302716	GCA_002015085.1	Scaffold	2.32904	39.9	91	2147	4	16
NCTC4557	SAMEA4076726	PRJEB6403	GCA_900450925.1	Contig	2.45881	40	2	2234	4	16
ZJ0906	SAMN02603634	PRJNA197214	GCA_000439395.1	Complete	2.32474	40.1	1	2211	12	19
Nagasaki	SAMN04571789	PRJNA315893	GCA_002777455.1	Complete	2.34896	40	1	2166	5	24
SCW0912	SAMN13282228	PRJNA589237	GCA_009707445.1	Complete	2.34901	40	1	2167	5	24
F9	SAMN02689465	PRJNA241369	GCA_000731865.1	Contig	2.48199	39.6	182	2251	6	30
SH0165	SAMN02603313	PRJNA31099	GCA_000021885.1	Complete	2.26916	40	1	2048	5	31
131	SAMN04240914	PRJNA301181	GCA_001938125.1	Scaffold	2.32611	39.6	109	2092	6	114
H38	SAMN04230866	PRJNA301181	GCA_001938325.1	Scaffold	2.4602	39.6	128	2186	10	160
H39	SAMN04230867	PRJNA301181	GCA_001938405.1	Scaffold	2.45443	39.5	134	2200	10	160
K3	SAMN04230868	PRJNA301181	GCA_001938335.1	Scaffold	2.49073	39.5	128	2232	10	160
16	SAMN04230857	PRJNA301181	GCA_001938295.1	Scaffold	2.19819	39.9	140	1987	N	161
HPS4	SAMN04230859	PRJNA301181	GCA_001938285.1	Scaffold	2.21245	39.9	112	1997	N	161
YT	SAMN04230858	PRJNA301181	GCA_001938365.1	Scaffold	2.19711	39.9	130	1973	N	161
KL0318	SAMN02996424	PRJNA258333	GCA_000742795.1	Complete	2.28088	40	1	2037	5	167
H12	SAMN04230877	PRJNA301181	GCA_001938205.1	Scaffold	2.18609	40	139	1996	4	168
H40	SAMN12923963	PRJNA576045	GCA_009796625.1	Scaffold	2.21196	39.9	126	2008	4	169
84-17975	SAMN02460616	PRJNA231554	GCA_000558945.1	Scaffold	2.3141	40	68	2086	13	170
H19	SAMN12868418	PRJNA574729	GCA_009796325.1	Contig	2.29746	39.8	150	2067	5	171
H45	SAMN12916207	PRJNA575941	GCA_009796465.1	Contig	2.10198	39.7	266	1901	5	175
H46	SAMN12916209	PRJNA575941	GCA_009796885.1	Contig	2.15884	40	129	1949	5	175
H190	SAMN13089056	PRJNA578986	GCA_009797495.1	Contig	2.18237	40	190	2024	13	176
H43	SAMN12916205	PRJNA575941	GCA_009796435.1	Scaffold	2.26743	39.9	134	2056	4	176
H68	SAMN12918835	PRJNA575960	GCA_009796535.1	Contig	2.14047	40	241	1970	4	176
HPS6	SAMN04230870	PRJNA301181	GCA_001938355.1	Scaffold	2.19334	39.9	123	1974	1	178
H27	SAMN12920650	PRJNA576022	GCA_009796575.1	Scaffold	2.17215	39.7	154	2014	5	180
H33	SAMN12920972	PRJNA576039	GCA_009797355.1	Scaffold	2.26686	40	170	2071	4	181
H35	SAMN04230880	PRJNA301181	GCA_001938215.1	Scaffold	2.24792	39.9	167	2084	4	181
H36	SAMN04230881	PRJNA301181	GCA_001938245.1	Scaffold	2.24297	39.9	161	2079	4	181
H164	SAMN13088897	PRJNA578954	GCA_009797405.1	Contig	2.16411	39.8	145	1977	N	184
H47	SAMN04230883	PRJNA301181	GCA_001938255.1	Scaffold	2.20956	39.9	171	2048	N	184
H49	SAMN12916214	PRJNA575941	GCA_009796475.1	Scaffold	2.35237	39.7	100	2113	10	185
H60	SAMN12917590	PRJNA575955	GCA_009796485.1	Contig	2.13879	39.9	162	1937	4	225
H160	SAMN13088887	PRJNA578950	GCA_009796655.1	Contig	2.38398	39.9	129	2171	4	254
EHP1804	SAMN17711763	PRJNA698302	GCA_016845695.1	Complete	2.43633	39.952	2	2176	2	279
GZ20170512	SAMN08449831	PRJNA432467	GCA_009831435.1	Complete	2.26689	40	1	2028	4	285
YHP1815	SAMN18175106	PRJNA707131	GCA_017352255.1	Complete	2.35756	39.9	1	2059	2	287
YHP170504	SAMN15042622	PRJNA635533	GCA_013285285.1	Complete	2.57073	39.5381	4	2256	8	288
CL120103	SAMN06477788	PRJNA377928	GCA_002055565.1	Complete	2.30535	40	1	2196	2	320
gx033	SAMN02469856	PRJNA82233	GCA_000478405.1	Contig	2.12779	39.8	121	1985	4	321
H100	SAMN12871374	PRJNA574880	GCA_009796335.1	Contig	2.22415	40	121	2007	13	322
H105	SAMN12877725	PRJNA575109	GCA_009796955.1	Contig	2.17444	39.9	168	1975	4	323
H106	SAMN12885513	PRJNA575316	GCA_009796895.1	Contig	2.21302	39.9	112	1962	13	324
H110	SAMN12885543	PRJNA575320	GCA_009796365.1	Contig	2.21302	39.9	112	1962	13	324
H112	SAMN12886260	PRJNA575332	GCA_009796375.1	Contig	2.21773	39.9	105	1959	13	325
H115	SAMN12886261	PRJNA575332	GCA_009796425.1	Contig	2.18171	39.9	163	1982	14	326
H134	SAMN12916175	PRJNA575934	GCA_009796905.1	Scaffold	2.23024	40	109	1998	13	327
HPS-1	SAMN11633338	PRJNA542552	GCA_008330065.1	Complete	2.32641	40	1	2095	4	328
H140	SAMN12916210	PRJNA580184	GCA_009797525.1	Contig	2.16747	40	116	1952	13	329
H157	SAMN13065564	PRJNA578573	GCA_009797365.1	Contig	2.47566	39.6	119	2203	15	330
H159	SAMN13075358	PRJNA578844	GCA_009796695.1	Contig	2.32307	40	124	2094	13	331
H143	SAMN13065543	PRJNA578568	GCA_009797335.1	Contig	2.2038	39.8	195	2050	14	332
H199	SAMN13150987	PRJNA580053	GCA_009797425.1	Contig	2.22199	40	121	1965	2	333
H233	SAMN12916948	PRJNA575943	GCA_009797015.1	Scaffold	2.28354	39.8	108	2108	7	334
H257	SAMN12918834	PRJNA575959	GCA_009797105.1	Scaffold	2.21419	39.8	119	2060	14	335
H259	SAMN12919854	PRJNA575964	GCA_009797165.1	Contig	2.16926	39.8	156	1976	5	336
H275	SAMN12920654	PRJNA576027	GCA_009797285.1	Scaffold	2.21272	39.8	134	2049	4	337
H292	SAMN12920889	PRJNA576034	GCA_009797295.1	Scaffold	2.19306	39.9	125	2006	14	338
H312	SAMN12920921	PRJNA576036	GCA_009797325.1	Scaffold	2.26477	39.7	101	2063	1	340
H74	SAMN12918836	PRJNA575960	GCA_009797135.1	Contig	2.25943	39.9	192	2092	12	341
H78	SAMN12918837	PRJNA575960	GCA_009797145.1	Scaffold	2.16645	40	121	1958	4	342
H80	SAMN12918838	PRJNA575960	GCA_009797125.1	Contig	2.16811	40	115	1950	4	342
H82	SAMN12920539	PRJNA576017	GCA_009797235.1	Contig	2.32943	40	177	2165	12	343
H92	SAMN12920543	PRJNA576017	GCA_009796565.1	Contig	2.28017	40	229	2118	12	343
HPS10	SAMN02769537	PRJNA235355	GCA_000688815.1	Contig	2.2704	40	222	2088	4	344
HPS11	SAMN02769536	PRJNA235356	GCA_000688835.1	Contig	2.11218	39.9	305	1933	N	345
SC1401	SAMN04620679	PRJNA317522	GCA_001611775.1	Complete	2.27754	40	1	1963	5	346
SH0104	SAMN07764636	PRJNA413741	GCA_003288155.1	Complete	2.24833	40	1	1983	5	347
H178	SAMN13150982	PRJNA580048	GCA_009797435.1	Contig	2.44476	39.6	147	2226	15	348
H191	SAMN13150925	PRJNA580043	GCA_009796675.1	Contig	2.22802	39.8	189	2073	14	349
H197	SAMN13151023	PRJNA580059	GCA_009797455.1	Contig	2.29933	39.9	166	2131	2	349
H222	SAMN13151172	PRJNA580076	GCA_009796725.1	Contig	2.17421	39.8	186	2035	4	350
H223	SAMN13151414	PRJNA580091	GCA_009797545.1	Contig	2.42858	39.6	145	2185	10	351
H263	SAMN12920517	PRJNA576015	GCA_009797205.1	Scaffold	2.15987	40	119	1928	5	352
H285	SAMN12920674	PRJNA576030	GCA_009797245.1	Scaffold	2.14096	39.8	120	1971	5	353
H52	SAMN12917589	PRJNA575955	GCA_009797065.1	Contig	2.18542	40	176	1968	1	354
H64	SAMN12917599	PRJNA575955	GCA_009797055.1	Contig	2.14534	39.9	149	1912	2	356
H87	SAMN12920540	PRJNA576017	GCA_009797225.1	Contig	2.22106	39.9	88	1960	1	357
H201	SAMN13151329	PRJNA580084	GCA_009797475.1	Contig	2.25022	39.8	159	2048	7	358
H90	SAMN12920542	PRJNA576017	GCA_009796525.1	Contig	2.22187	39.9	89	1965	1	359
H313	SAMN12920959	PRJNA576038	GCA_009796645.1	Scaffold	2.29143	39.9	169	2189	13	360
aHPS7	SAMN14142732	PRJNA607662	GCA_011044315.1	Complete	2.35592	39.9	1	2057	7	366
vHPS7	SAMN14142694	PRJNA607655	GCA_011044295.1	Complete	2.27584	39.9	1	1971	7	370
YHP1818	SAMN18175053	PRJNA707125	GCA_017352235.1	Complete	2.31385	40	2	2088	4	428
GHP1807	SAMN18175496	PRJNA707139	GCA_017352295.1	Complete	2.44055	40.0096	2	2197	2	429
GHP1808	SAMN18175488	PRJNA707138	GCA_017352275.1	Complete	2.3179	40	1	2116	4	431
HPS9	SAMN02769535	PRJNA235354	GCA_000688855.1	Contig	2.1914	39.8	209	2042	12	455
12939	SAMN02470072	PRJNA184681	GCA_000444605.1	Contig	1.95303	39.8	76	1756	1	nem
84-15995	SAMN02470071	PRJNA184682	GCA_000444625.1	Contig	2.09083	39.8	73	1959	15	nem
CZ2501	SAMN13403700	PRJNA592029	GCA_009827955.1	Scaffold	2.15858	39.9	128	1947	5	nem
D74	SAMN04571787	PRJNA315891	GCA_002777395.1	Complete	2.47916	39.6649	2	2155	9	nem
H25	SAMN12917597	PRJNA575956	GCA_009796985.1	Contig	2.08249	39.7	497	1977	4	nem
H465	SAMN02470069	PRJNA184683	GCA_000444645.1	Contig	1.49851	39.9	94	1540	11	nem
H61	SAMN12917598	PRJNA575955	GCA_009797005.1	Contig	2.25566	40	144	2074	14	nem
Hp100/13	SAMN05948859	PRJNA271652	GCA_001877015.1	Scaffold	2.47296	40.4	383	2345	N	nem
HPS412	SAMN12167197	PRJNA551876	GCA_013373555.1	Complete	2.47922	40	1	2278	4	nem
LHDR_HPS_1_2	SAMN16967641	PRJNA681738	GCA_015832095.1	Complete	2.27927	40	1	1961	2	nem
MN-H	SAMN02470070	PRJNA184680	GCA_000444585.1	Contig	1.76109	39.7	82	1620	13	nem
MS1001	SAMN13403698	PRJNA592029	GCA_009827965.1	Scaffold	2.28115	39.9	80	2058	13	nem
SH03	SAMN02953022	PRJNA257533	GCA_000740985.1	Complete	2.26593	40	1	2033	7	nem
SN0403	SAMN13403699	PRJNA592029	GCA_009827935.1	Scaffold	2.19395	39.9	64	1930	2	nem
ST4-1	SAMN02388246	PRJNA218835	GCA_000690655.1	Contig	2.18553	39.9	191	2040	4	nem
ST4-2	SAMN02390865	PRJNA218836	GCA_000690675.1	Contig	2.18899	39.9	211	2049	4	nem
SW114	SAMN02470068	PRJNA184679	GCA_000444565.1	Contig	1.93854	39.7	98	1724	3	nem
SW140	SAMN02470067	PRJNA184686	GCA_000444705.1	Contig	1.41342	39.7	77	1484	2	nem
XJ1901	SAMN13403701	PRJNA592029	GCA_009827875.1	Scaffold	2.14836	39.8	81	1917	4	nem

## Sheet: Sheet2
Strain	BioSample	BioProject	Assembly	Level	Size(Mb)	GC%	Scaffolds	CDS	serotype	ST
sHPS7	SAMN14142481	PRJNA607642	GCA_011044275.1	Complete	2.27621	40	1	2034	7	4	#EE9A00	#F5F5F5		sHPS7 #EE9A00	sHPS7 #F5F5F5
29755	SAMN06464217	PRJNA377707	GCA_003286935.1	Complete	2.3526	40	1	2157	5	8	#EE0000	#96CDCD		29755 #EE0000	29755 #96CDCD
CCUG3712	SAMN06308701	PRJNA302716	GCA_002015085.1	Scaffold	2.32904	39.9	91	2147	4	16	#EEA2AD	#FAF0E6		CCUG3712 #EEA2AD	CCUG3712 #FAF0E6
NCTC4557	SAMEA4076726	PRJEB6403	GCA_900450925.1	Contig	2.45881	40	2	2234	4	16	#EEA2AD	#FAF0E6		NCTC4557 #EEA2AD	NCTC4557 #FAF0E6
ZJ0906	SAMN02603634	PRJNA197214	GCA_000439395.1	Complete	2.32474	40.1	1	2211	12	19	#FFFF00	#7AC5CD		ZJ0906 #FFFF00	ZJ0906 #7AC5CD
Nagasaki	SAMN04571789	PRJNA315893	GCA_002777455.1	Complete	2.34896	40	1	2166	5	24	#EE0000	#FFE4C4		Nagasaki #EE0000	Nagasaki #FFE4C4
SCW0912	SAMN13282228	PRJNA589237	GCA_009707445.1	Complete	2.34901	40	1	2167	5	24	#EE0000	#FFE4C4		SCW0912 #EE0000	SCW0912 #FFE4C4
F9	SAMN02689465	PRJNA241369	GCA_000731865.1	Contig	2.48199	39.6	182	2251	6	30	#EECFA1	#00C5CD		F9 #EECFA1	F9 #00C5CD
SH0165	SAMN02603313	PRJNA31099	GCA_000021885.1	Complete	2.26916	40	1	2048	5	31	#EE0000	#FFF8DC		SH0165 #EE0000	SH0165 #FFF8DC
131	SAMN04240914	PRJNA301181	GCA_001938125.1	Scaffold	2.32611	39.6	109	2092	6	114	#EECFA1	#00CDCD		131 #EECFA1	131 #00CDCD
H38	SAMN04230866	PRJNA301181	GCA_001938325.1	Scaffold	2.4602	39.6	128	2186	N	160	#F8F8FF	#F0FFF0		H38 #F8F8FF	H38 #F0FFF0
H39	SAMN04230867	PRJNA301181	GCA_001938405.1	Scaffold	2.45443	39.5	134	2200	N	160	#F8F8FF	#F0FFF0		H39 #F8F8FF	H39 #F0FFF0
K3	SAMN04230868	PRJNA301181	GCA_001938335.1	Scaffold	2.49073	39.5	128	2232	N	160	#F8F8FF	#F0FFF0		K3 #F8F8FF	K3 #F0FFF0
16	SAMN04230857	PRJNA301181	GCA_001938295.1	Scaffold	2.19819	39.9	140	1987	N	161	#F8F8FF	#79CDCD		16 #F8F8FF	16 #79CDCD
HPS4	SAMN04230859	PRJNA301181	GCA_001938285.1	Scaffold	2.21245	39.9	112	1997	N	161	#F8F8FF	#79CDCD		HPS4 #F8F8FF	HPS4 #79CDCD
YT	SAMN04230858	PRJNA301181	GCA_001938365.1	Scaffold	2.19711	39.9	130	1973	N	161	#F8F8FF	#79CDCD		YT #F8F8FF	YT #79CDCD
KL0318	SAMN02996424	PRJNA258333	GCA_000742795.1	Complete	2.28088	40	1	2037	5	167	#EE0000	#E6E6FA		KL0318 #EE0000	KL0318 #E6E6FA
H12	SAMN04230877	PRJNA301181	GCA_001938205.1	Scaffold	2.18609	40	139	1996	4	168	#EEA2AD	#66CDAA		H12 #EEA2AD	H12 #66CDAA
H40	SAMN12923963	PRJNA576045	GCA_009796625.1	Scaffold	2.21196	39.9	126	2008	N	169	#F8F8FF	#000000		H40 #F8F8FF	H40 #000000
84-17975	SAMN02460616	PRJNA231554	GCA_000558945.1	Scaffold	2.3141	40	68	2086	13	170	#7FFFD4	#9BCD9B		84-17975 #7FFFD4	84-17975 #9BCD9B
H19	SAMN12868418	PRJNA574729	GCA_009796325.1	Contig	2.29746	39.8	150	2067	5	171	#EE0000	#778899		H19 #EE0000	H19 #778899
H45	SAMN12916207	PRJNA575941	GCA_009796465.1	Contig	2.10198	39.7	266	1901	5	175	#EE0000	#43CD80		H45 #EE0000	H45 #43CD80
H46	SAMN12916209	PRJNA575941	GCA_009796885.1	Contig	2.15884	40	129	1949	5	175	#EE0000	#43CD80		H46 #EE0000	H46 #43CD80
H43	SAMN12916205	PRJNA575941	GCA_009796435.1	Scaffold	2.26743	39.9	134	2056	4	176	#EEA2AD	#000080		H43 #EEA2AD	H43 #000080
H68	SAMN12918835	PRJNA575960	GCA_009796535.1	Contig	2.14047	40	241	1970	4	176	#EEA2AD	#000080		H68 #EEA2AD	H68 #000080
H190	SAMN13089056	PRJNA578986	GCA_009797495.1	Contig	2.18237	40	190	2024	13	176	#7FFFD4	#000080		H190 #7FFFD4	H190 #000080
HPS6	SAMN04230870	PRJNA301181	GCA_001938355.1	Scaffold	2.19334	39.9	123	1974	1	178	#7A8B8B	#7CCD7C		HPS6 #7A8B8B	HPS6 #7CCD7C
H27	SAMN12920650	PRJNA576022	GCA_009796575.1	Scaffold	2.17215	39.7	154	2014	5	180	#EE0000	#7B68EE		H27 #EE0000	H27 #7B68EE
H33	SAMN12920972	PRJNA576039	GCA_009797355.1	Scaffold	2.26686	40	170	2071	4	181	#EEA2AD	#00CD66		H33 #EEA2AD	H33 #00CD66
H35	SAMN04230880	PRJNA301181	GCA_001938215.1	Scaffold	2.24792	39.9	167	2084	4	181	#EEA2AD	#00CD66		H35 #EEA2AD	H35 #00CD66
H36	SAMN04230881	PRJNA301181	GCA_001938245.1	Scaffold	2.24297	39.9	161	2079	4	181	#EEA2AD	#00CD66		H36 #EEA2AD	H36 #00CD66
H164	SAMN13088897	PRJNA578954	GCA_009797405.1	Contig	2.16411	39.8	145	1977	N	184	#F8F8FF	#0000FF		H164 #F8F8FF	H164 #0000FF
H47	SAMN04230883	PRJNA301181	GCA_001938255.1	Scaffold	2.20956	39.9	171	2048	N	184	#F8F8FF	#0000FF		H47 #F8F8FF	H47 #0000FF
H49	SAMN12916214	PRJNA575941	GCA_009796475.1	Scaffold	2.35237	39.7	100	2113	10	185	#FA8072	#00CD00		H49 #FA8072	H49 #00CD00
H60	SAMN12917590	PRJNA575955	GCA_009796485.1	Contig	2.13879	39.9	162	1937	4	225	#EEA2AD	#87CEFA		H60 #EEA2AD	H60 #87CEFA
H160	SAMN13088887	PRJNA578950	GCA_009796655.1	Contig	2.38398	39.9	129	2171	4	254	#EEA2AD	#66CD00		H160 #EEA2AD	H160 #66CD00
EHP1804	SAMN17711763	PRJNA698302	GCA_016845695.1	Complete	2.43633	39.952	2	2176	2	279	#90EE90	#B0E0E6		EHP1804 #90EE90	EHP1804 #B0E0E6
GZ20170512	SAMN08449831	PRJNA432467	GCA_009831435.1	Complete	2.26689	40	1	2028	4	285	#EEA2AD	#9ACD32		GZ20170512 #EEA2AD	GZ20170512 #9ACD32
YHP1815	SAMN18175106	PRJNA707131	GCA_017352255.1	Complete	2.35756	39.9	1	2059	2	287	#90EE90	#40E0D0		YHP1815 #90EE90	YHP1815 #40E0D0
YHP170504	SAMN15042622	PRJNA635533	GCA_013285285.1	Complete	2.57073	39.5381	4	2256	8	288	#EEE9E9	#A2CD5A		YHP170504 #EEE9E9	YHP170504 #A2CD5A
CL120103	SAMN06477788	PRJNA377928	GCA_002055565.1	Complete	2.30535	40	1	2196	2	320	#90EE90	#66CDAA		CL120103 #90EE90	CL120103 #66CDAA
gx033	SAMN02469856	PRJNA82233	GCA_000478405.1	Contig	2.12779	39.8	121	1985	4	321	#EEA2AD	#CDC673		gx033 #EEA2AD	gx033 #CDC673
H100	SAMN12871374	PRJNA574880	GCA_009796335.1	Contig	2.22415	40	121	2007	13	322	#7FFFD4	#8FBC8F		H100 #7FFFD4	H100 #8FBC8F
H105	SAMN12877725	PRJNA575109	GCA_009796955.1	Contig	2.17444	39.9	168	1975	4	323	#EEA2AD	#CDBE70		H105 #EEA2AD	H105 #CDBE70
H106	SAMN12885513	PRJNA575316	GCA_009796895.1	Contig	2.21302	39.9	112	1962	13	324	#7FFFD4	#98FB98		H106 #7FFFD4	H106 #98FB98
H110	SAMN12885543	PRJNA575320	GCA_009796365.1	Contig	2.21302	39.9	112	1962	13	324	#7FFFD4	#98FB98		H110 #7FFFD4	H110 #98FB98
H112	SAMN12886260	PRJNA575332	GCA_009796375.1	Contig	2.21773	39.9	105	1959	13	325	#7FFFD4	#CDCDB4		H112 #7FFFD4	H112 #CDCDB4
H115	SAMN12886261	PRJNA575332	GCA_009796425.1	Contig	2.18171	39.9	163	1982	14	326	#FFE4B5	#7FFF00		H115 #FFE4B5	H115 #7FFF00
H134	SAMN12916175	PRJNA575934	GCA_009796905.1	Scaffold	2.23024	40	109	1998	13	327	#7FFFD4	#CDCD00		H134 #7FFFD4	H134 #CDCD00
HPS-1	SAMN11633338	PRJNA542552	GCA_008330065.1	Complete	2.32641	40	1	2095	4	328	#EEA2AD	#9ACD32		HPS-1 #EEA2AD	HPS-1 #9ACD32
H140	SAMN12916210	PRJNA580184	GCA_009797525.1	Contig	2.16747	40	116	1952	13	329	#7FFFD4	#CDAD00		H140 #7FFFD4	H140 #CDAD00
H157	SAMN13065564	PRJNA578573	GCA_009797365.1	Contig	2.47566	39.6	119	2203	15	330	#AEEEEE	#EEE8AA		H157 #AEEEEE	H157 #EEE8AA
H159	SAMN13075358	PRJNA578844	GCA_009796695.1	Contig	2.32307	40	124	2094	13	331	#7FFFD4	#CD9B1D		H159 #7FFFD4	H159 #CD9B1D
H143	SAMN13065543	PRJNA578568	GCA_009797335.1	Contig	2.2038	39.8	195	2050	14	332	#FFE4B5	#FFD700		H143 #FFE4B5	H143 #FFD700
H199	SAMN13150987	PRJNA580053	GCA_009797425.1	Contig	2.22199	40	121	1965	2	333	#90EE90	#CD950C		H199 #90EE90	H199 #CD950C
H233	SAMN12916948	PRJNA575943	GCA_009797015.1	Scaffold	2.28354	39.8	108	2108	7	334	#EE9A00	#CD5C5C		H233 #EE9A00	H233 #CD5C5C
H257	SAMN12918834	PRJNA575959	GCA_009797105.1	Scaffold	2.21419	39.8	119	2060	14	335	#FFE4B5	#8B6969		H257 #FFE4B5	H257 #8B6969
H259	SAMN12919854	PRJNA575964	GCA_009797165.1	Contig	2.16926	39.8	156	1976	5	336	#EE0000	#CD853F		H259 #EE0000	H259 #CD853F
H275	SAMN12920654	PRJNA576027	GCA_009797285.1	Scaffold	2.21272	39.8	134	2049	N	337	#F8F8FF	#CD5555		H275 #F8F8FF	H275 #CD5555
H292	SAMN12920889	PRJNA576034	GCA_009797295.1	Scaffold	2.19306	39.9	125	2006	14	338	#FFE4B5	#F4A460		H292 #FFE4B5	H292 #F4A460
H312	SAMN12920921	PRJNA576036	GCA_009797325.1	Scaffold	2.26477	39.7	101	2063	1	340	#7A8B8B	#CD6839		H312 #7A8B8B	H312 #CD6839
H74	SAMN12918836	PRJNA575960	GCA_009797135.1	Contig	2.25943	39.9	192	2092	12	341	#FFFF00	#A52A2A		H74 #FFFF00	H74 #A52A2A
H78	SAMN12918837	PRJNA575960	GCA_009797145.1	Scaffold	2.16645	40	121	1958	4	342	#EEA2AD	#CDAA7D		H78 #EEA2AD	H78 #CDAA7D
H80	SAMN12918838	PRJNA575960	GCA_009797125.1	Contig	2.16811	40	115	1950	4	342	#EEA2AD	#CDAA7D		H80 #EEA2AD	H80 #CDAA7D
H82	SAMN12920539	PRJNA576017	GCA_009797235.1	Contig	2.32943	40	177	2165	12	343	#FFFF00	#FFA500		H82 #FFFF00	H82 #FFA500
H92	SAMN12920543	PRJNA576017	GCA_009796565.1	Contig	2.28017	40	229	2118	12	343	#FFFF00	#FFA500		H92 #FFFF00	H92 #FFA500
HPS10	SAMN02769537	PRJNA235355	GCA_000688815.1	Contig	2.2704	40	222	2088	4	344	#EEA2AD	#CDBA96		HPS10 #EEA2AD	HPS10 #CDBA96
HPS11	SAMN02769536	PRJNA235356	GCA_000688835.1	Contig	2.11218	39.9	305	1933	N	345	#F8F8FF	#FF6347		HPS11 #F8F8FF	HPS11 #FF6347
SC1401	SAMN04620679	PRJNA317522	GCA_001611775.1	Complete	2.27754	40	1	1963	5	346	#EE0000	#CD853F		SC1401 #EE0000	SC1401 #CD853F
SH0104	SAMN07764636	PRJNA413741	GCA_003288155.1	Complete	2.24833	40	1	1983	5	347	#EE0000	#FF1493		SH0104 #EE0000	SH0104 #FF1493
H178	SAMN13150982	PRJNA580048	GCA_009797435.1	Contig	2.44476	39.6	147	2226	15	348	#AEEEEE	#CD661D		H178 #AEEEEE	H178 #CD661D
H197	SAMN13151023	PRJNA580059	GCA_009797455.1	Contig	2.29933	39.9	166	2131	2	349	#90EE90	#B03060		H197 #90EE90	H197 #B03060
H191	SAMN13150925	PRJNA580043	GCA_009796675.1	Contig	2.22802	39.8	189	2073	14	349	#FFE4B5	#B03060		H191 #FFE4B5	H191 #B03060
H222	SAMN13151172	PRJNA580076	GCA_009796725.1	Contig	2.17421	39.8	186	2035	4	350	#EEA2AD	#CD2626		H222 #EEA2AD	H222 #CD2626
H223	SAMN13151414	PRJNA580091	GCA_009797545.1	Contig	2.42858	39.6	145	2185	10	351	#FA8072	#EE82EE		H223 #FA8072	H223 #EE82EE
H263	SAMN12920517	PRJNA576015	GCA_009797205.1	Scaffold	2.15987	40	119	1928	5	352	#EE0000	#CD3333		H263 #EE0000	H263 #CD3333
H285	SAMN12920674	PRJNA576030	GCA_009797245.1	Scaffold	2.14096	39.8	120	1971	5	353	#EE0000	#9932CC		H285 #EE0000	H285 #9932CC
H52	SAMN12917589	PRJNA575955	GCA_009797065.1	Contig	2.18542	40	176	1968	1	354	#7A8B8B	#CD7054		H52 #7A8B8B	H52 #CD7054
H64	SAMN12917599	PRJNA575955	GCA_009797055.1	Contig	2.14534	39.9	149	1912	2	356	#90EE90	#9370DB		H64 #90EE90	H64 #9370DB
H87	SAMN12920540	PRJNA576017	GCA_009797225.1	Contig	2.22106	39.9	88	1960	1	357	#7A8B8B	#CD8162		H87 #7A8B8B	H87 #CD8162
H201	SAMN13151329	PRJNA580084	GCA_009797475.1	Contig	2.25022	39.8	159	2048	7	358	#EE9A00	#CDC9C9		H201 #EE9A00	H201 #CDC9C9
H90	SAMN12920542	PRJNA576017	GCA_009796525.1	Contig	2.22187	39.9	89	1965	1	359	#7A8B8B	#CD8500		H90 #7A8B8B	H90 #CD8500
H313	SAMN12920959	PRJNA576038	GCA_009796645.1	Scaffold	2.29143	39.9	169	2189	13	360	#7FFFD4	#CDC5BF		H313 #7FFFD4	H313 #CDC5BF
aHPS7	SAMN14142732	PRJNA607662	GCA_011044315.1	Complete	2.35592	39.9	1	2057	7	366	#EE9A00	#CD6600		aHPS7 #EE9A00	aHPS7 #CD6600
vHPS7	SAMN14142694	PRJNA607655	GCA_011044295.1	Complete	2.27584	39.9	1	1971	7	370	#EE9A00	#CDC0B0		vHPS7 #EE9A00	vHPS7 #CDC0B0
YHP1818	SAMN18175053	PRJNA707125	GCA_017352235.1	Complete	2.31385	40	2	2088	4	428	#EEA2AD	#CD5B45		YHP1818 #EEA2AD	YHP1818 #CD5B45
GHP1807	SAMN18175496	PRJNA707139	GCA_017352295.1	Complete	2.44055	40.0096	2	2197	2	429	#90EE90	#CDB79E		GHP1807 #90EE90	GHP1807 #CDB79E
GHP1808	SAMN18175488	PRJNA707138	GCA_017352275.1	Complete	2.3179	40	1	2116	4	431	#EEA2AD	#CD4F39		GHP1808 #EEA2AD	GHP1808 #CD4F39
HPS9	SAMN02769535	PRJNA235354	GCA_000688855.1	Contig	2.1914	39.8	209	2042	12	455	#FFFF00	#CDAF95		HPS9 #FFFF00	HPS9 #CDAF95
12939	SAMN02470072	PRJNA184681	GCA_000444605.1	Contig	1.95303	39.8	76	1756	1	nem	#7A8B8B	#F0FFF0		12939 #7A8B8B	12939 #F0FFF0
LHDR_HPS_1_2	SAMN16967641	PRJNA681738	GCA_015832095.1	Complete	2.27927	40	1	1961	2	nem	#90EE90	#F0FFF0		LHDR_HPS_1_2 #90EE90	LHDR_HPS_1_2 #F0FFF0
SN0403	SAMN13403699	PRJNA592029	GCA_009827935.1	Scaffold	2.19395	39.9	64	1930	2	nem	#90EE90	#F0FFF0		SN0403 #90EE90	SN0403 #F0FFF0
SW140	SAMN02470067	PRJNA184686	GCA_000444705.1	Contig	1.41342	39.7	77	1484	2	nem	#90EE90	#F0FFF0		SW140 #90EE90	SW140 #F0FFF0
SW114	SAMN02470068	PRJNA184679	GCA_000444565.1	Contig	1.93854	39.7	98	1724	3	nem	#8B0000	#F0FFF0		SW114 #8B0000	SW114 #F0FFF0
H25	SAMN12917597	PRJNA575956	GCA_009796985.1	Contig	2.08249	39.7	497	1977	4	nem	#EEA2AD	#F0FFF0		H25 #EEA2AD	H25 #F0FFF0
HPS412	SAMN12167197	PRJNA551876	GCA_013373555.1	Complete	2.47922	40	1	2278	4	nem	#EEA2AD	#F0FFF0		HPS412 #EEA2AD	HPS412 #F0FFF0
ST4-1	SAMN02388246	PRJNA218835	GCA_000690655.1	Contig	2.18553	39.9	191	2040	4	nem	#EEA2AD	#F0FFF0		ST4-1 #EEA2AD	ST4-1 #F0FFF0
ST4-2	SAMN02390865	PRJNA218836	GCA_000690675.1	Contig	2.18899	39.9	211	2049	4	nem	#EEA2AD	#F0FFF0		ST4-2 #EEA2AD	ST4-2 #F0FFF0
XJ1901	SAMN13403701	PRJNA592029	GCA_009827875.1	Scaffold	2.14836	39.8	81	1917	4	nem	#EEA2AD	#F0FFF0		XJ1901 #EEA2AD	XJ1901 #F0FFF0
CZ2501	SAMN13403700	PRJNA592029	GCA_009827955.1	Scaffold	2.15858	39.9	128	1947	5	nem	#EE0000	#F0FFF0		CZ2501 #EE0000	CZ2501 #F0FFF0
SH03	SAMN02953022	PRJNA257533	GCA_000740985.1	Complete	2.26593	40	1	2033	7	nem	#EE9A00	#F0FFF0		SH03 #EE9A00	SH03 #F0FFF0
D74	SAMN04571787	PRJNA315891	GCA_002777395.1	Complete	2.47916	39.6649	2	2155	9	nem	#EED8AE	#F0FFF0		D74 #EED8AE	D74 #F0FFF0
H465	SAMN02470069	PRJNA184683	GCA_000444645.1	Contig	1.49851	39.9	94	1540	11	nem	#EEAD0E	#F0FFF0		H465 #EEAD0E	H465 #F0FFF0
MN-H	SAMN02470070	PRJNA184680	GCA_000444585.1	Contig	1.76109	39.7	82	1620	13	nem	#7FFFD4	#F0FFF0		MN-H #7FFFD4	MN-H #F0FFF0
MS1001	SAMN13403698	PRJNA592029	GCA_009827965.1	Scaffold	2.28115	39.9	80	2058	13	nem	#7FFFD4	#F0FFF0		MS1001 #7FFFD4	MS1001 #F0FFF0
H61	SAMN12917598	PRJNA575955	GCA_009797005.1	Contig	2.25566	40	144	2074	14	nem	#FFE4B5	#F0FFF0		H61 #FFE4B5	H61 #F0FFF0
84-15995	SAMN02470071	PRJNA184682	GCA_000444625.1	Contig	2.09083	39.8	73	1959	15	nem	#AEEEEE	#F0FFF0		84-15995 #AEEEEE	84-15995 #F0FFF0
Hp100_13	SAMN05948859	PRJNA271652	GCA_001877015.1	Scaffold	2.47296	40.4	383	2345	N	nem	#F8F8FF	#F0FFF0		Hp100_13 #F8F8FF	Hp100_13 #F0FFF0
