# Supplementary material for: Isolation and identification of two highly virulent Glaesserella parasuis serovar 7 strains in China
Source: Research Square preprint supplement (doi:10.21203/rs.3.rs-6901161/v1), 2025-08-12
Supplement: Supplementary file 2 [file b94b287769aa84e45a0daa39.xlsx]

## Sheet: Sheet1
Table 1. General properties of the genome of isolates
Name	Size (bp)	GC%	Genes (total)	CDSs (total)	Genes (coding)	CDSs (with protein)	Pseudo Genes (total)	CRISPR	rRNAs	tRNAs	ncRNAs
vHPS7	2275841	39.93	2216	2135	1977	1977	158	4	19	58	4
aHPS7	2355923	39.92	2298	2217	2073	2073	144	3	19	58	4
